# Supplementary material
Source: PubMed Central journal article supplement (PMC7748973)

**A computational drug repurposing approach in identifying the cephalosporin antibiotic and anti-hepatitis C drug derivatives for COVID-19 treatment**

**Raj Kumar<sup>1†\*</sup>, Vikas Kumar<sup>2†</sup>, Keun Woo Lee<sup>2\*</sup>**

<sup>1</sup>Department of Biotechnology and Bioinformatics, Jaypee University of Information Technology, Waknaghat, Solan, Himachal Pradesh, 173 234, India

<sup>2</sup>Division of Life Science, Department of Bio & Medical Big Data (BK21 Four Program), Plant Molecular Biology and Biotechnology Research Center (PMBBRC), Research Institute of Natural Science (RINS), Gyeongsang National University (GNU), 501 Jinju-daero, Jinju 52828, Republic of Korea

\*Correspondence: [raj.kumar@juit.ac.in](mailto:raj.kumar@juit.ac.in), [kwlee@gnu.ac.kr](mailto:kwlee@gnu.ac.kr)

†These authors contributed equally to this work.

**Supplementary Table 1.** Detailed specifications of the systems used for MD simulations.

| <b>No.</b> | <b>System</b>                          | <b>No. of TIP3P<br/>waters</b> | <b>No. of Na+<br/>counter ions</b> | <b>System size (nm)</b> |
|------------|----------------------------------------|--------------------------------|------------------------------------|-------------------------|
| 1          | M <sup>pro</sup> + ceftaroline fosamil | 19212                          | 3                                  | 5.113 × 6.674 × 5.991   |
| 2          | M <sup>pro</sup> + remikiren           | 19209                          | 4                                  | 5.113 × 6.674 × 5.991   |
| 3          | M <sup>pro</sup> + everolimus          | 19180                          | 4                                  | 5.113 × 6.674 × 5.991   |
| 4          | M <sup>pro</sup> + atorvastatin        | 19211                          | 5                                  | 5.113 × 6.674 × 5.991   |
| 5          | M <sup>pro</sup> + sildenafil          | 19220                          | 4                                  | 5.113 × 6.674 × 5.991   |
| 6          | M <sup>pro</sup> + telaprevir          | 19202                          | 4                                  | 5.113 × 6.674 × 5.991   |
| 7          | M <sup>pro</sup> + clofazimine         | 19231                          | 4                                  | 5.113 × 6.674 × 5.991   |
| 8          | M <sup>pro</sup> + N3                  | 19207                          | 4                                  | 5.113 × 6.674 × 5.991   |
| 9          | M <sup>pro</sup> + lopinavir           | 19205                          | 4                                  | 5.113 × 6.674 × 5.991   |
| 10         | M <sup>pro</sup> + ritonavir           | 19207                          | 4                                  | 5.113 × 6.674 × 5.991   |

**Supplementary Table 2.** List of 149 drug molecules showing binding with SARS-CoV-2 M<sup>pro</sup> protein.

| No. | Name of drug          | Goldscore | Chemscore | Structure                                                                             |
|-----|-----------------------|-----------|-----------|---------------------------------------------------------------------------------------|
| 1   | Ceftaroline fosamil   | 82.33     | -33.62    | 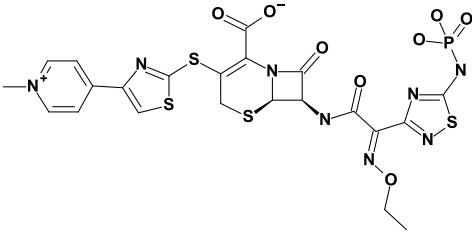    |
| 2   | Remikiren             | 80.04     | -26.76    |    |
| 3   | Everolimus            | 79.63     | -28.02    |   |
| 4   | Atorvastatin          | 76.06     | -33.95    |  |
| 5   | Colfosceril palmitate | 75.87     | -22.69    |   |
| 6   | Cangrelor             | 74.26     | -10.27    |  |

|    |                             |       |        |                                                                                       |
|----|-----------------------------|-------|--------|---------------------------------------------------------------------------------------|
| 7  | Sildenafil                  | 74.03 | -28.85 | 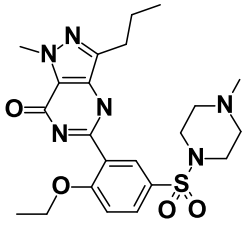   |
| 8  | Flavin adenine dinucleotide | 72.58 | -8.74  |     |
| 9  | Pentagastrin                | 72.23 | -15.91 |     |
| 10 | Ioxilan                     | 71.41 | -17.45 |  |
| 11 | Fosamprenavir               | 70.71 | -22.94 |  |
| 12 | Montelukast                 | 70.56 | -23.78 |  |

---

13 Dipyridamole 69.11 -12.78

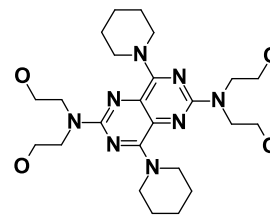

14 Telaprevir 68.78 -29.32

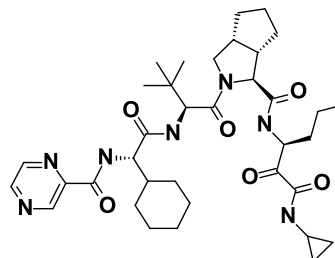

15 Iopamidol 68.73 -9.11

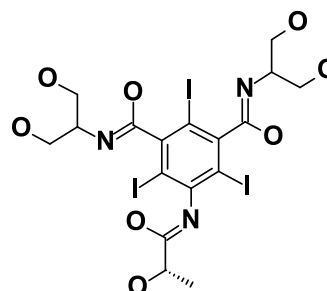

16 Carboprost Tromethamine 67.81 -22.77

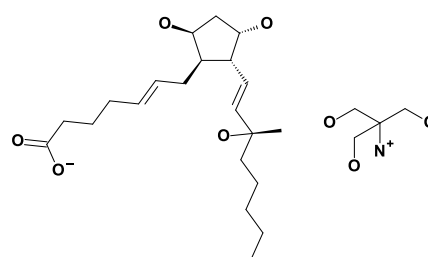

17 Aztreonam 67.22 -20.17

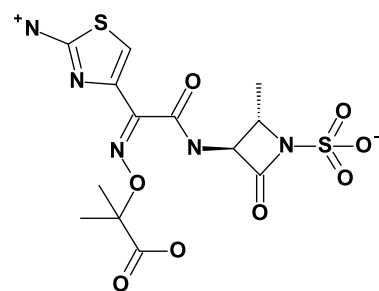

18 Gallamine Triethiodide 67.19 -23.53

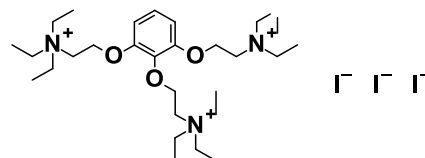

19 Ceritinib 67.11 -23.51

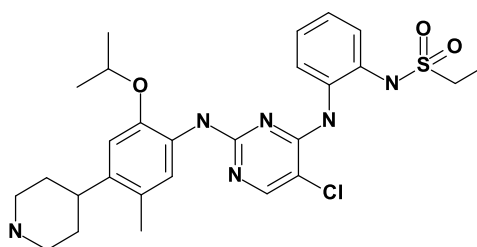

|    |              |       |        |                                                                                       |
|----|--------------|-------|--------|---------------------------------------------------------------------------------------|
| 20 | Forasartan   | 66.75 | -22.21 | 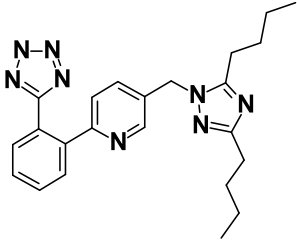   |
| 21 | Bedaquiline  | 66.71 | -23.74 |    |
| 22 | Clofazimine  | 66.05 | -33.41 |    |
| 23 | Tipranavir   | 65.25 | -27.64 |   |
| 24 | Telmisartan  | 65.19 | -29.83 |   |
| 25 | Suramin      | 64.85 | -21.63 |  |
| 26 | Streptomycin | 64.60 | -4.761 |  |

|    |              |       |        |                                                                                       |
|----|--------------|-------|--------|---------------------------------------------------------------------------------------|
| 27 | Tyloxapol    | 63.68 | -27.41 | 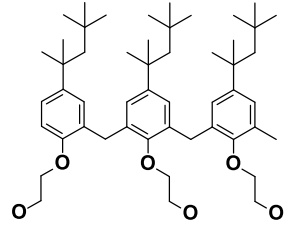   |
| 28 | Verteporfin  | 63.61 | -27.43 |    |
| 29 | Zafirlukast  | 63.49 | -32.66 |     |
| 30 | Bosentan     | 63.06 | -20.42 |    |
| 31 | Lumefantrine | 62.86 | -30.03 |  |
| 32 | Halofantrine | 62.71 | -25.57 |  |
| 33 | Acridinium   | 62.32 | -29.65 |  |

|    |                   |       |        |                                                                                       |
|----|-------------------|-------|--------|---------------------------------------------------------------------------------------|
| 34 | Nelfinavir        | 62.31 | -24.58 | 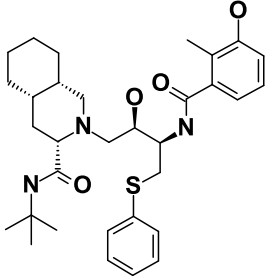   |
| 35 | Canagliflozin     | 62.27 | -30.18 |    |
| 36 | Fulvestrant       | 61.75 | -23.21 |     |
| 37 | Isosulfan blue    | 61.58 | -28.38 |   |
| 38 | Lomitapide        | 61.51 | -30.81 |  |
| 39 | Amiodarone        | 61.15 | -30.31 |  |
| 40 | Homoharringtonine | 60.95 | -19.12 |  |



|    |                                    |       |        |                                                                                       |
|----|------------------------------------|-------|--------|---------------------------------------------------------------------------------------|
| 41 | Lopinavir                          | 60.86 | -26.09 | 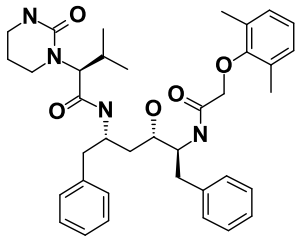   |
| 42 | Trametinib                         | 60.41 | -24.14 |    |
| 43 | Mezlocillin                        | 60.23 | -25.64 |    |
| 44 | Valrubicin                         | 59.33 | -19.11 |   |
| 45 | Hydroxystilbamidine<br>Isethionate | 59.31 | -20.77 |   |
| 46 | Reserpine                          | 59.27 | -29.63 |  |
| 47 | Lucanthone                         | 59.06 | -27.65 |  |
| 48 | Tubocurarine                       | 58.96 | -27.07 |  |

|    |             |       |        |                                                                                       |
|----|-------------|-------|--------|---------------------------------------------------------------------------------------|
| 49 | Efonidipine | 58.86 | -28.22 | 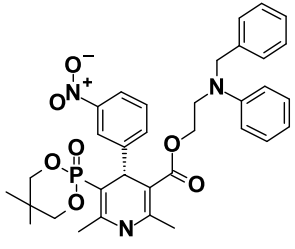   |
| 50 | Moricizine  | 58.73 | -27.48 |    |
| 51 | Arbekacin   | 58.72 | -9.94  |   |
| 52 | Imatinib    | 58.55 | -29.78 |  |
| 53 | Bopindolol  | 58.33 | -27.39 |  |
| 54 | Cobimetinib | 58.22 | -25.75 |  |
| 55 | Dabrafenib  | 57.79 | -27.37 |  |
| 56 | Deserpidine | 57.53 | -31.04 |  |

|    |                       |       |        |                                                                                       |
|----|-----------------------|-------|--------|---------------------------------------------------------------------------------------|
| 57 | Thiothixene           | 56.91 | -24.04 | 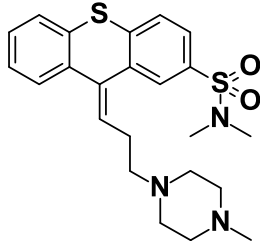   |
| 58 | Trisalicylate-choline | 56.81 | -26.89 |     |
| 59 | Trovafloxacin         | 56.76 | -25.34 |    |
| 60 | Antrafenine           | 56.64 | -27.31 |   |
| 61 | Zotepine              | 56.46 | -26.51 |  |
| 62 | Deferasirox           | 56.21 | -23.97 |  |
| 63 | Elvitegravir          | 56.06 | -27.63 |  |

|    |              |       |        |                                                                                       |
|----|--------------|-------|--------|---------------------------------------------------------------------------------------|
| 64 | Fimasartan   | 55.96 | -24.88 | 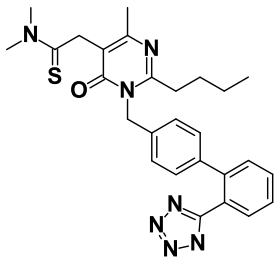   |
| 65 | Enzalutamide | 55.91 | -30.54 |    |
| 66 | Toremifene   | 55.83 | -31.53 |    |
| 67 | Bifonazole   | 55.77 | -28.78 |   |
| 68 | Blonanserin  | 55.77 | -28.86 |  |
| 69 | Etoricoxib   | 55.55 | -28.27 |  |
| 70 | Auranofin    | 55.23 | -16.63 |  |

|    |              |       |        |  |
|----|--------------|-------|--------|--|
| 71 | Captodiame   | 55.14 | -27.92 |  |
| 72 | Raloxifene   | 55.03 | -29.36 |  |
| 73 | Flunarizine  | 54.95 | -30.77 |  |
| 74 | Vitamin E    | 54.85 | -24.62 |  |
| 75 | Simvastatin  | 54.32 | -30.22 |  |
| 76 | Voacamine    | 53.71 | -24.55 |  |
| 77 | Umeclidinium | 53.19 | -27.31 |  |
| 78 | Bepridil     | 52.91 | -25.34 |  |
| 79 | Gliclazide   | 52.58 | -32.19 |  |

|    |              |       |        |                                                                                       |
|----|--------------|-------|--------|---------------------------------------------------------------------------------------|
| 80 | Calcidiol    | 52.31 | -26.85 | 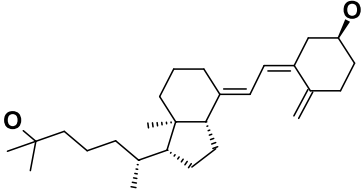   |
| 81 | Vemurafenib  | 52.24 | -26.34 |    |
| 82 | Cloperastine | 52.18 | -30.08 |    |
| 83 | Irinotecan   | 51.91 | -28.02 |     |
| 84 | Trimethaphan | 51.78 | -32.82 |   |
| 85 | Ezetimibe    | 51.32 | -26.06 |  |
| 86 | Cinnarizine  | 51.31 | -30.71 |  |
| 87 | Clomifene    | 51.07 | -31.01 |  |
| 88 | Aprindine    | 51.07 | -27.71 |  |

|    |                 |       |        |                                                                                       |
|----|-----------------|-------|--------|---------------------------------------------------------------------------------------|
| 89 | Bexarotene      | 50.92 | -29.89 | 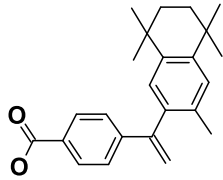   |
| 90 | Adapalene       | 50.79 | -32.41 |    |
| 91 | Dronabinol      | 50.73 | -25.97 |    |
| 92 | Zuclopenthixol  | 50.65 | -26.84 |    |
| 93 | Calcitriol      | 50.64 | -28.16 |   |
| 94 | Methdilazine    | 50.63 | -27.43 |  |
| 95 | Trihexyphenidyl | 50.47 | -26.55 |  |
| 96 | Bumetanide      | 50.44 | -24.49 |  |

|     |                |       |        |  |
|-----|----------------|-------|--------|--|
| 97  | Gentian Violet | 50.32 | -30.59 |  |
| 98  | Vismodegib     | 50.26 | -28.62 |  |
| 99  | Amodiaquine    | 50.21 | -26.44 |  |
| 100 | Tasosartan     | 49.87 | -28.09 |  |
| 101 | Encainide      | 49.83 | -27.43 |  |
| 102 | Buclizine      | 49.81 | -37.43 |  |
| 103 | Indapamide     | 49.34 | -28.58 |  |
| 104 | Trypan blue    | 49.15 | -33.11 |  |
| 105 | Fentanyl       | 49.01 | -26.51 |  |



|     |                     |       |        |                                                                                       |
|-----|---------------------|-------|--------|---------------------------------------------------------------------------------------|
| 106 | Cyproheptadine      | 49.01 | -30.34 | 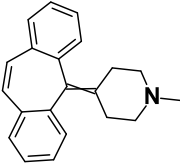   |
| 107 | Ivacaftor           | 48.57 | -31.34 |    |
| 108 | Acitretin           | 48.54 | -26.42 |    |
| 109 | Cefprozil           | 48.43 | -28.84 |    |
| 110 | Bendroflumethiazide | 48.36 | -17.21 |   |
| 111 | Doxapram            | 48.21 | -26.93 |  |
| 112 | Buprenorphine       | 47.99 | -25.66 |  |
| 113 | Dimetindene         | 47.77 | -26.73 |  |
| 114 | Alverine            | 47.57 | -27.62 |  |
| 115 | Estramustine        | 47.51 | -24.02 |  |

|     |              |       |        |                                                                                       |
|-----|--------------|-------|--------|---------------------------------------------------------------------------------------|
| 116 | Meclizine    | 47.33 | -29.36 | 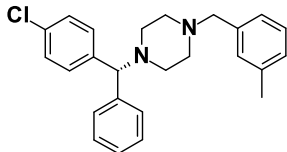   |
| 117 | Clozapine    | 47.13 | -28.01 |    |
| 118 | Dosulepin    | 47.01 | -26.44 |    |
| 119 | Tazarotene   | 47.01 | -21.31 |     |
| 120 | Vildagliptin | 46.91 | -20.18 |  |
| 121 | Olanzapine   | 46.73 | -27.17 |  |
| 122 | Loxapine     | 46.69 | -25.84 |  |
| 123 | Conivaptan   | 46.67 | -31.08 |  |

|     |                                 |       |        |                                                                                       |
|-----|---------------------------------|-------|--------|---------------------------------------------------------------------------------------|
| 124 | Palonosetron                    | 46.51 | -26.55 | 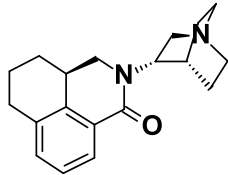   |
| 125 | Estradiol<br>valerate/Dienogest | 46.07 | -26.94 |    |
| 126 | Lisdexamfetamine                | 45.97 | -27.09 |    |
| 127 | Butenafine                      | 45.86 | -28.29 |    |
| 128 | Tamoxifen                       | 45.35 | -28.86 |  |
| 129 | Pirenzepine                     | 44.81 | -20.65 |  |
| 130 | Sulfasalazine                   | 44.81 | -22.39 |  |
| 131 | Ketotifen                       | 44.47 | -28.03 |  |
| 132 | Cholecalciferol                 | 44.45 | -30.51 |   |

|     |                     |       |        |                                                                                       |
|-----|---------------------|-------|--------|---------------------------------------------------------------------------------------|
| 133 | Hexachlorophene     | 44.37 | -22.56 | 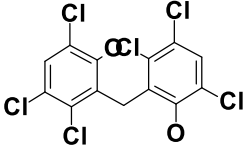   |
| 134 | Nabilone            | 43.67 | -26.29 |    |
| 135 | Loratadine          | 43.03 | -24.88 |    |
| 136 | Amoxapine           | 42.77 | -26.59 |    |
| 137 | Trospium            | 42.51 | -25.71 |   |
| 138 | Azatadine           | 42.33 | -28.68 |  |
| 139 | Tolvaptan           | 42.14 | -27.52 |  |
| 140 | Fluticasone furoate | 41.78 | -17.38 |  |
| 141 | Ergocalciferol      | 40.94 | -27.61 |  |
| 142 | Diazepam            | 39.52 | -22.86 |  |

---

|     |                           |       |        |                                                                                       |
|-----|---------------------------|-------|--------|---------------------------------------------------------------------------------------|
| 143 | Chlordiazepoxide          | 39.18 | -22.18 | 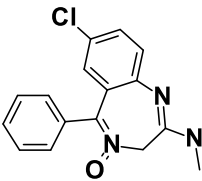   |
| 144 | Maprotiline               | 38.97 | -23.01 |    |
| 145 | Gestodene                 | 38.02 | -28.07 |    |
| 146 | Testolactone              | 37.25 | -29.82 |    |
| 147 | Tauroursodeoxycholic acid | 35.95 | -27.29 |   |
| 148 | Stanozolol                | 34.77 | -26.72 |  |
| 149 | Spinosad                  | 33.41 | -30.63 |  |

---

**Supplementary Table 3.** 2D interactions exhibited by the reference inhibitors and candidate drugs during docking experiment. Reference inhibitors are indicated in *italics>*.

| No. | Name             | 2D interactions |
|-----|------------------|-----------------|
| 1   | <i>N3</i>        |                 |
| 2   | <i>Lopinavir</i> |                 |

3 *Ritonavir*

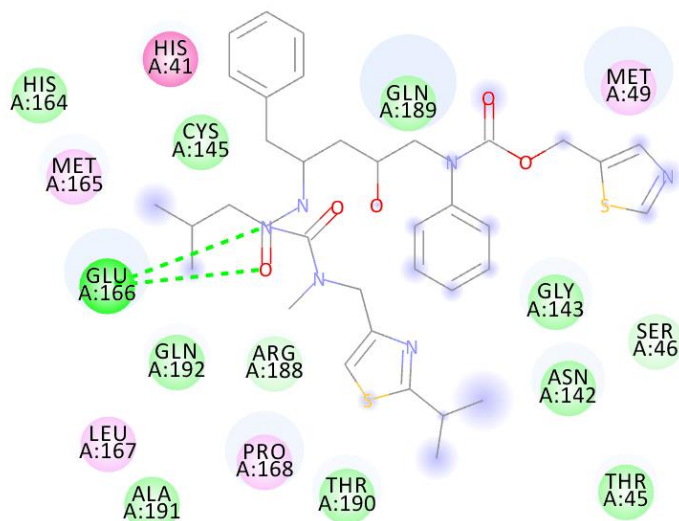

4 Ceftaroline fosamil

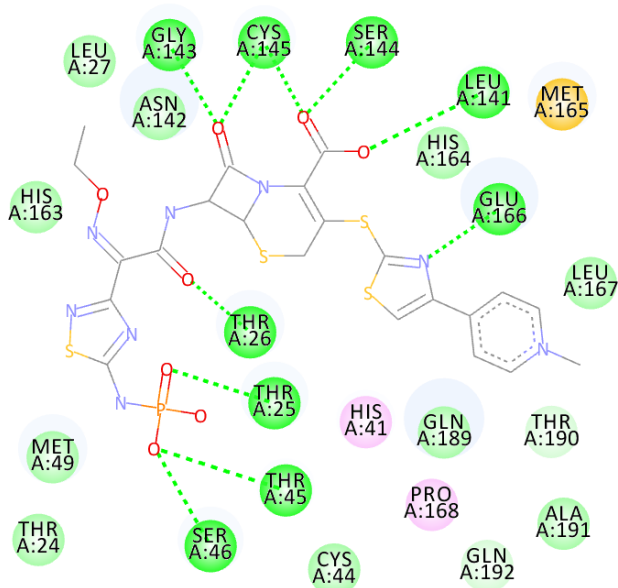

5 Telaprevir

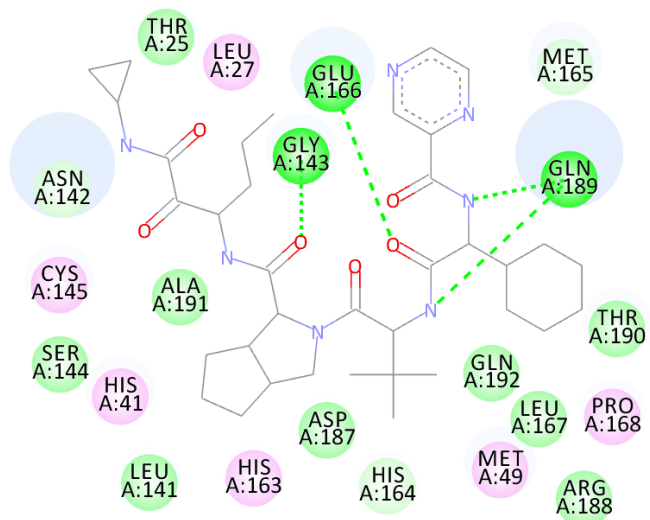

6 Remikiren

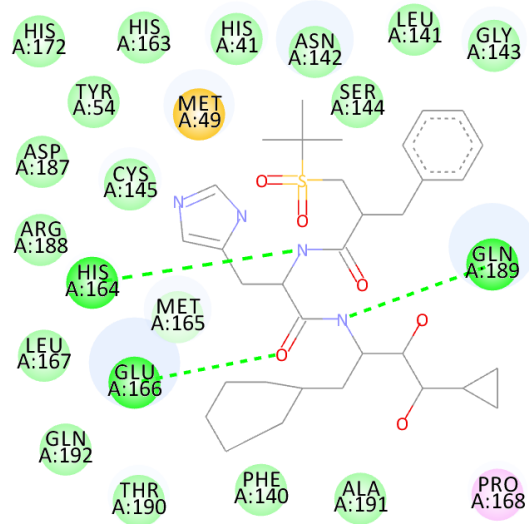

7 Everolimus

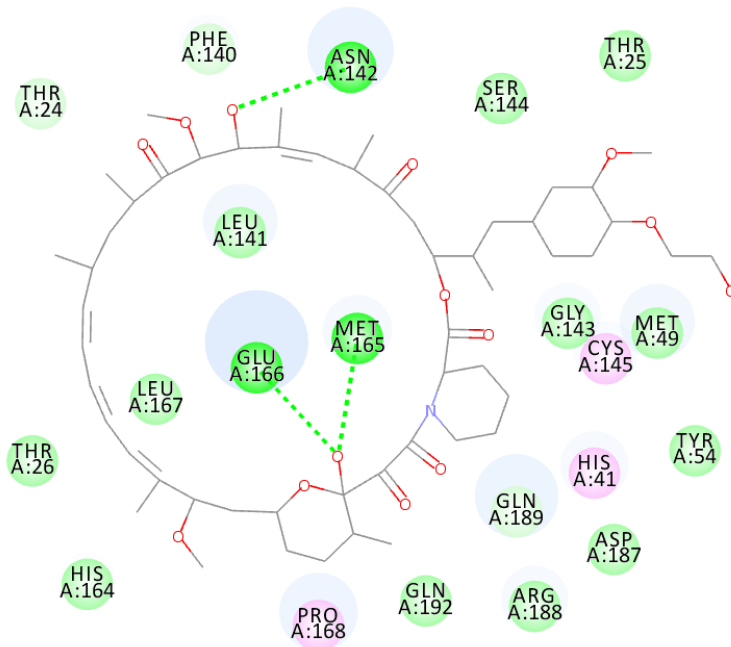

8 Atorvastatin

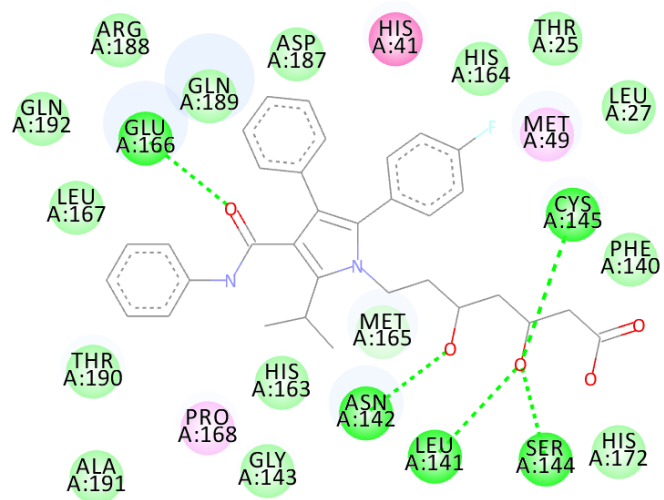



9 Sildenafil

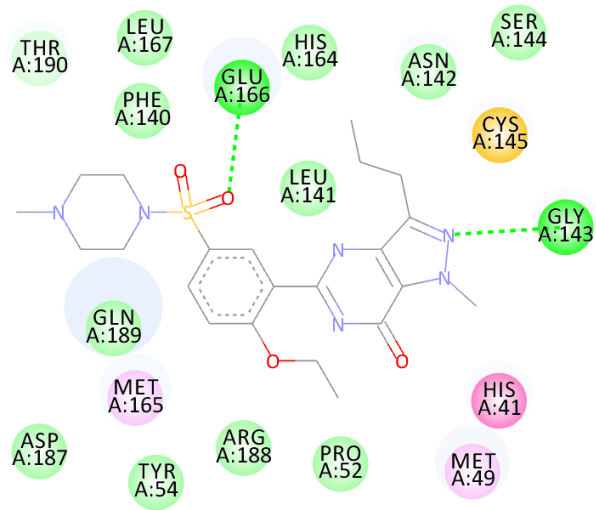

10 Clofazimine

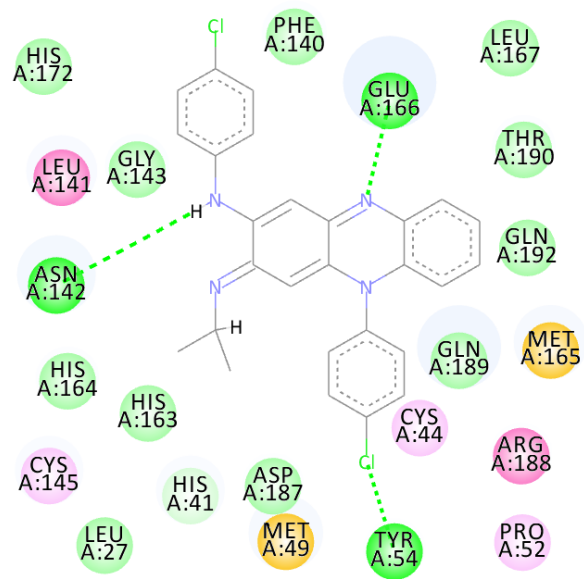



---

Compound 4      75.50      -30.09

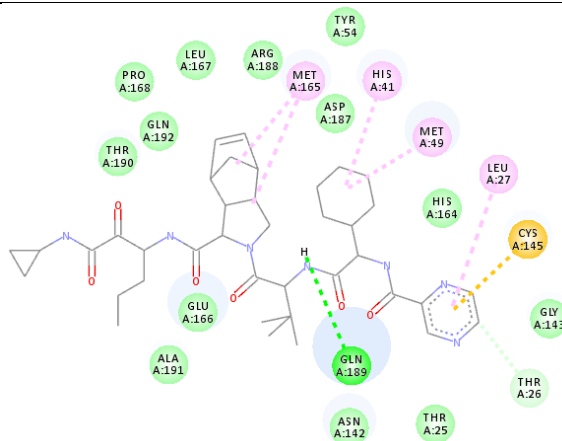

Compound 5      75.23      -30.26

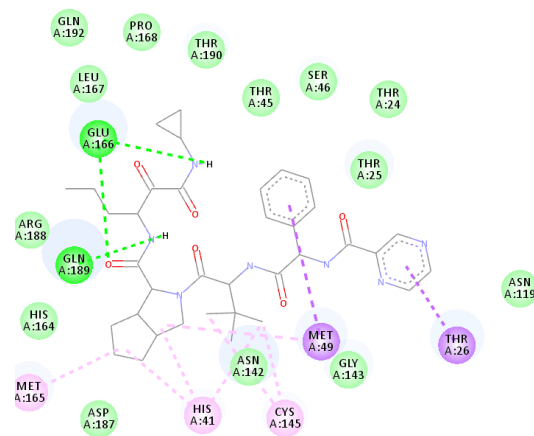

Compound 6      75.17      -30.95

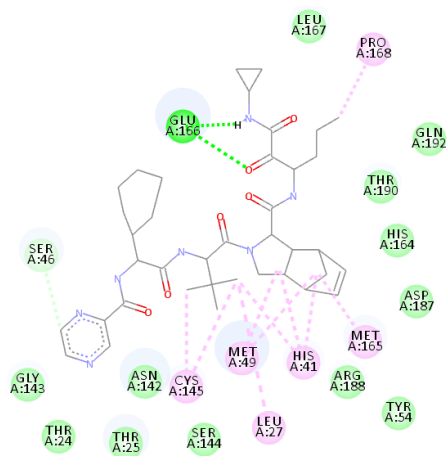

Compound 7 75.10 -30.84

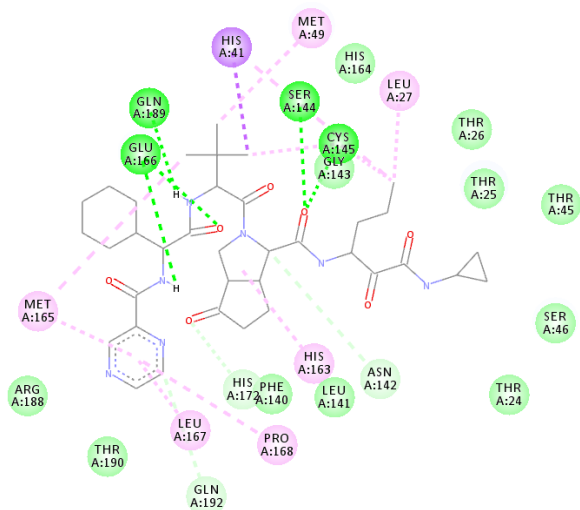

Compound 8 74.10 -29.34

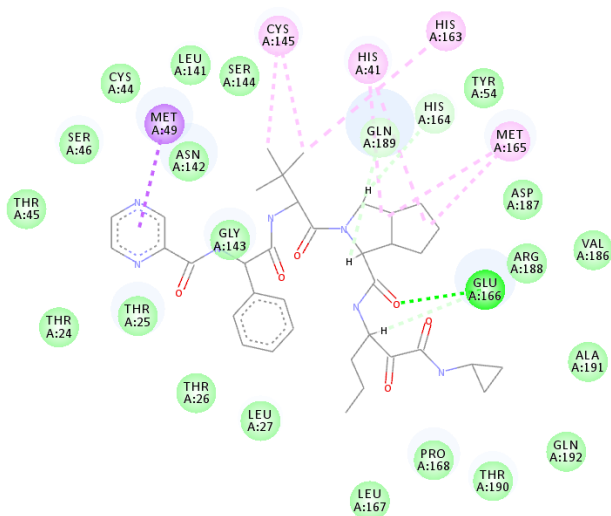

Compound 9 73.03 -36.75

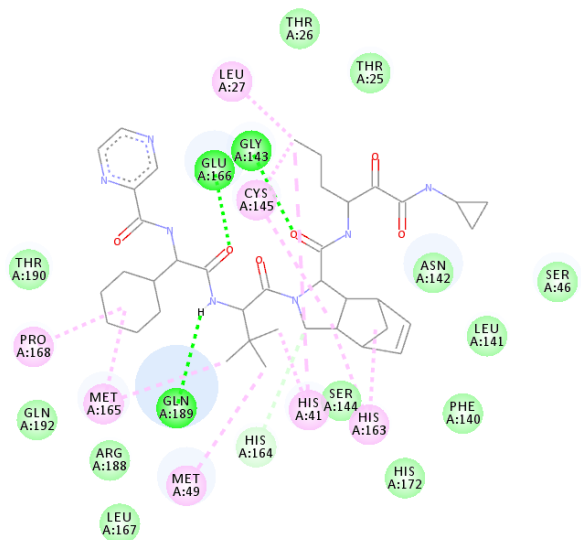

---

Compound 10      72.16      -30.76

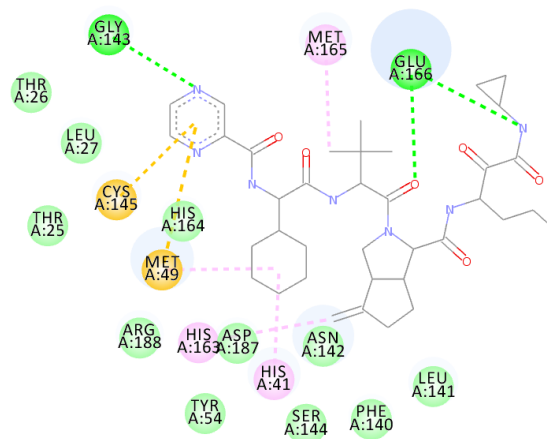

Compound 11      69.06      -30.52

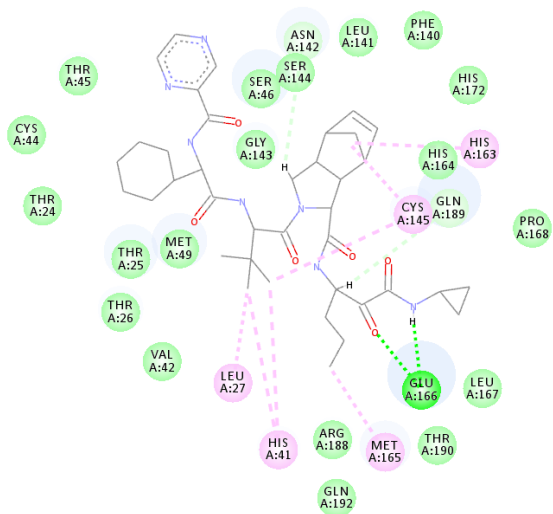

Compound 12      63.92      -26.24

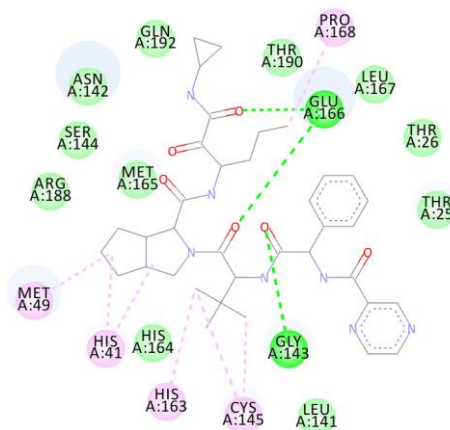

---

Compound 13      61.58      -22.48

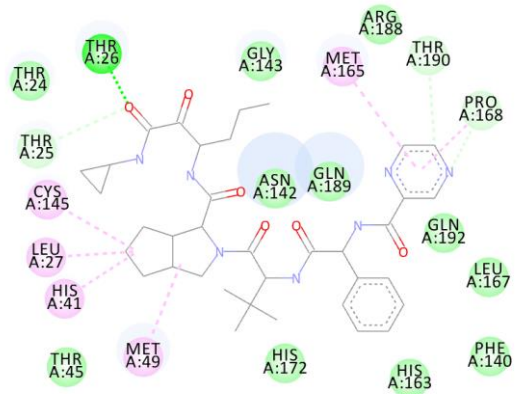

Compound 14      51.36      -22.24

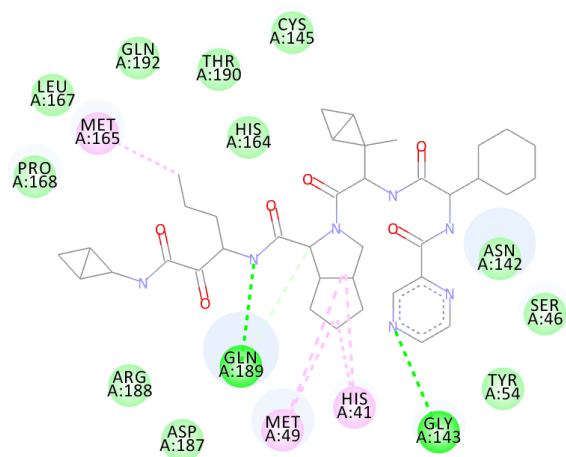

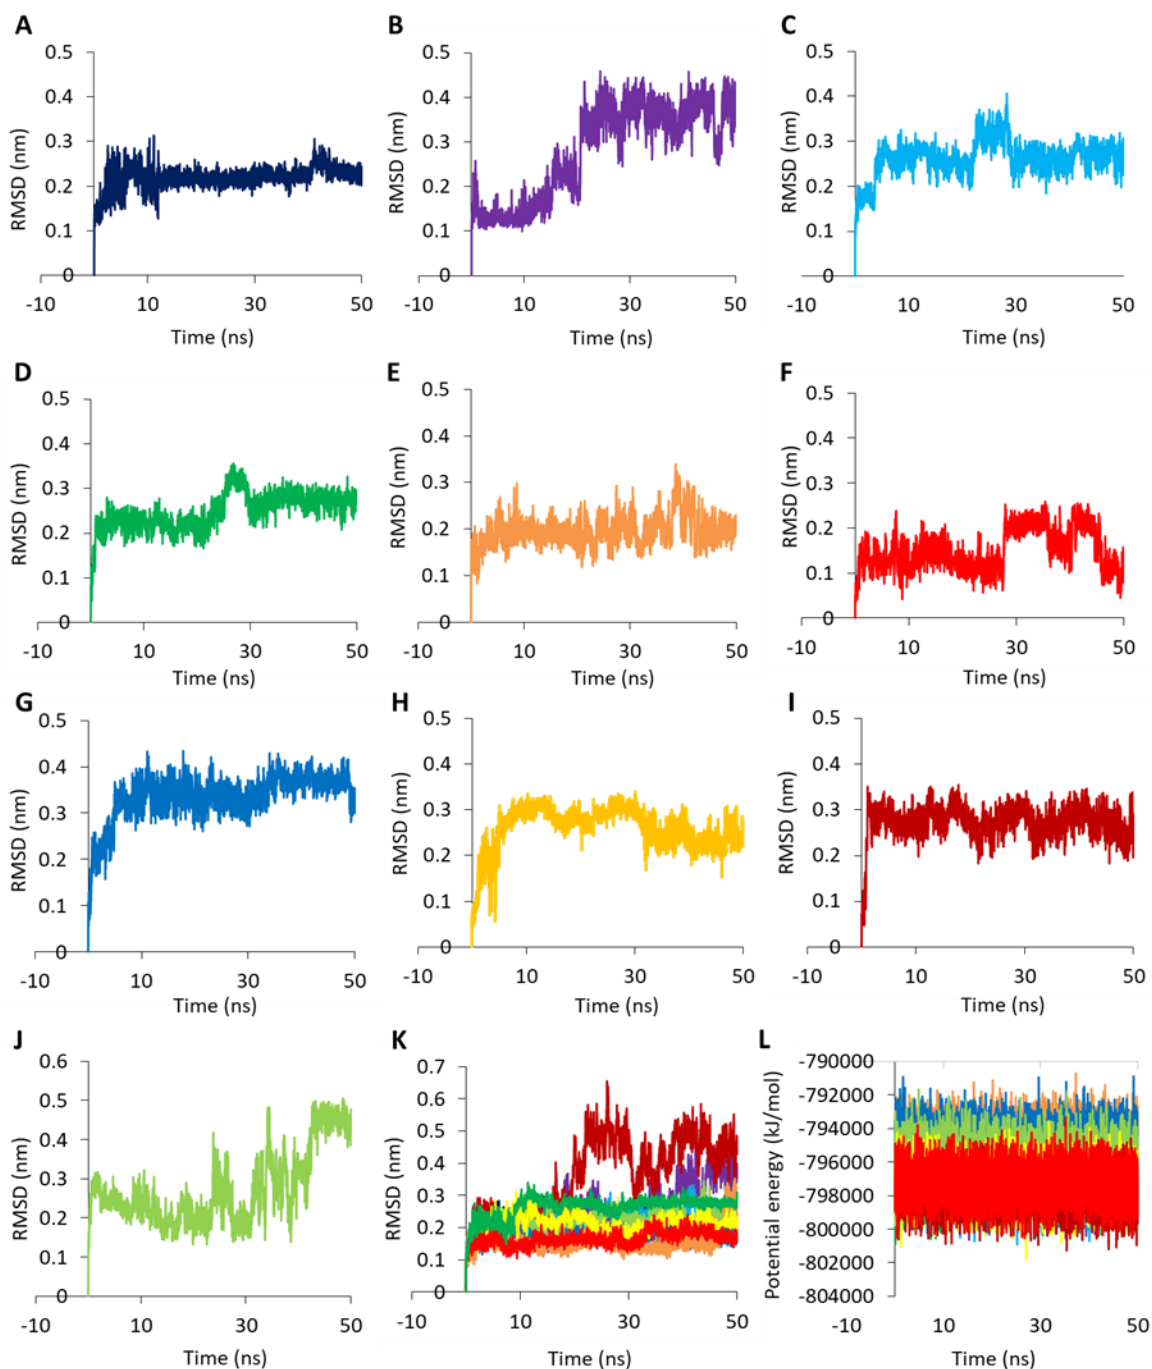

**Supplementary Figure S1.** Assessment of stability of simulation systems using ligand RMSD, protein RMSD, and potential energy profiles. Ligand RMSD values of (A) N3, (B) Lopinavir, (C) Ritonavir, (D) Ceftaroline fosamil, (E) Telaprevir, (F) Clofazimine, (G) Everolimus, (H) Sildenafil, (I) Atorvastatin, and (J) Remikiren. (K) The superimposed protein backbone atoms RMSD profiles of the M<sup>pro</sup> in complex with N3 inhibitor, lopinavir, ritonavir, telaprevir, and ceftaroline fosamil indicated in dark blue, purple, cyan, orange, and

green, respectively, and (L) the potential energy plots of the simulation systems during 50 ns simulations. The color coding is the same as (K).



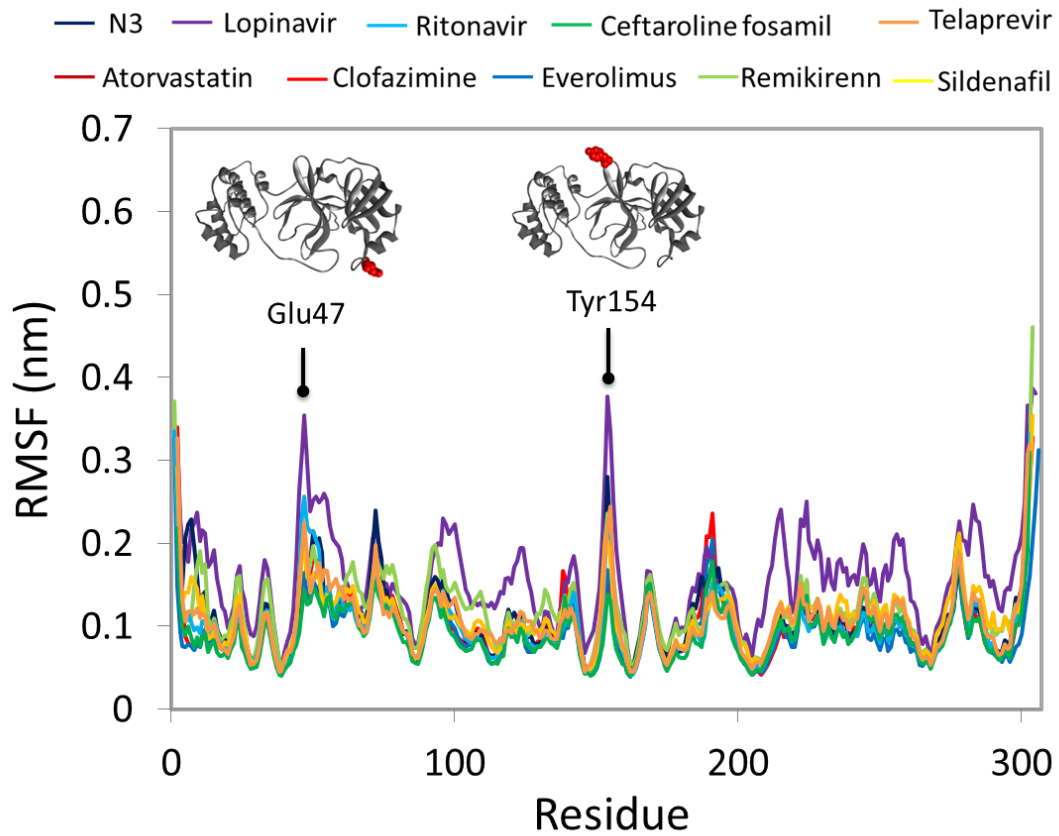

**Supplementary Figure S2.** RMSF profiles for  $C\alpha$  atoms of SARS-CoV-2  $M^{\text{pro}}$ . The  $M^{\text{pro}}$  in complex with inhibitor N3, lopinavir, ritonavir, telaprevir, and ceftaroline fosamil are indicated in dark blue, purple, cyan, orange, and green, respectively. The insets represent  $M^{\text{pro}}$  in cartoon structure with flexible residues highlighted in red.

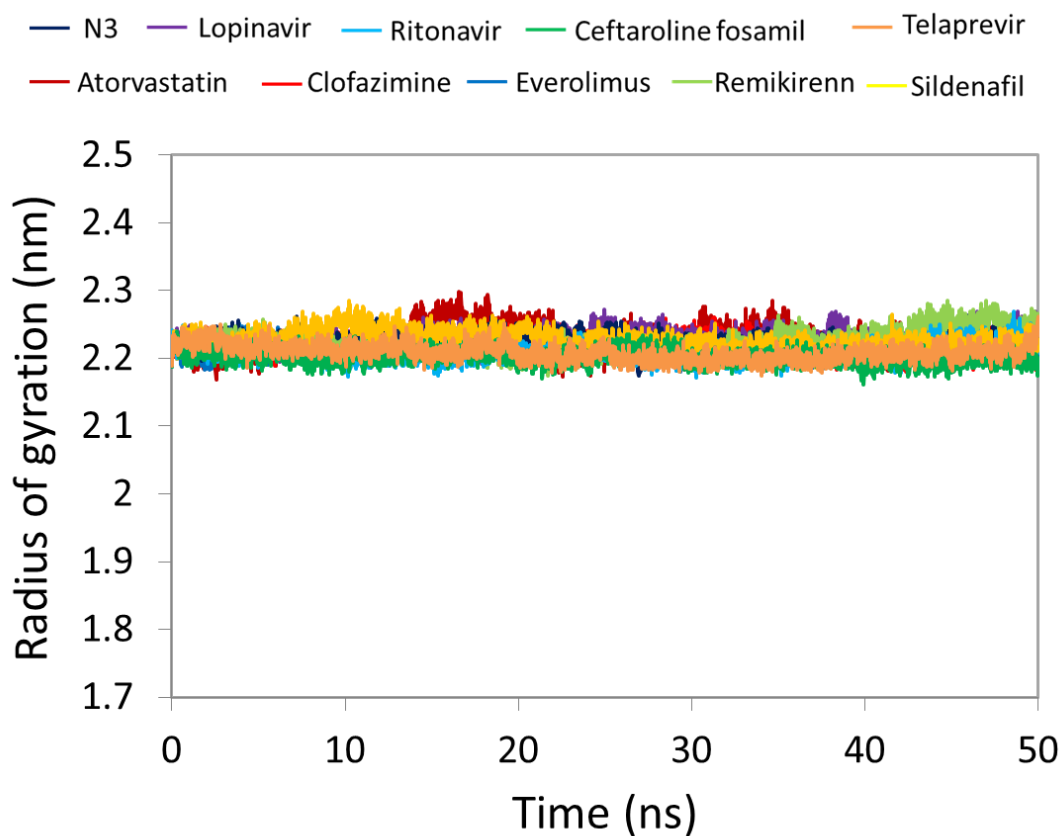

**Supplementary Figure S3.** Calculation of radius of gyration for SARS-CoV-2 M<sup>pro</sup> during 50 ns simulations. The M<sup>pro</sup> in complex with inhibitor N3, lopinavir, ritonavir, telaprevir, and ceftaroline fosamil are indicated in dark blue, purple, cyan, orange, and green, respectively.

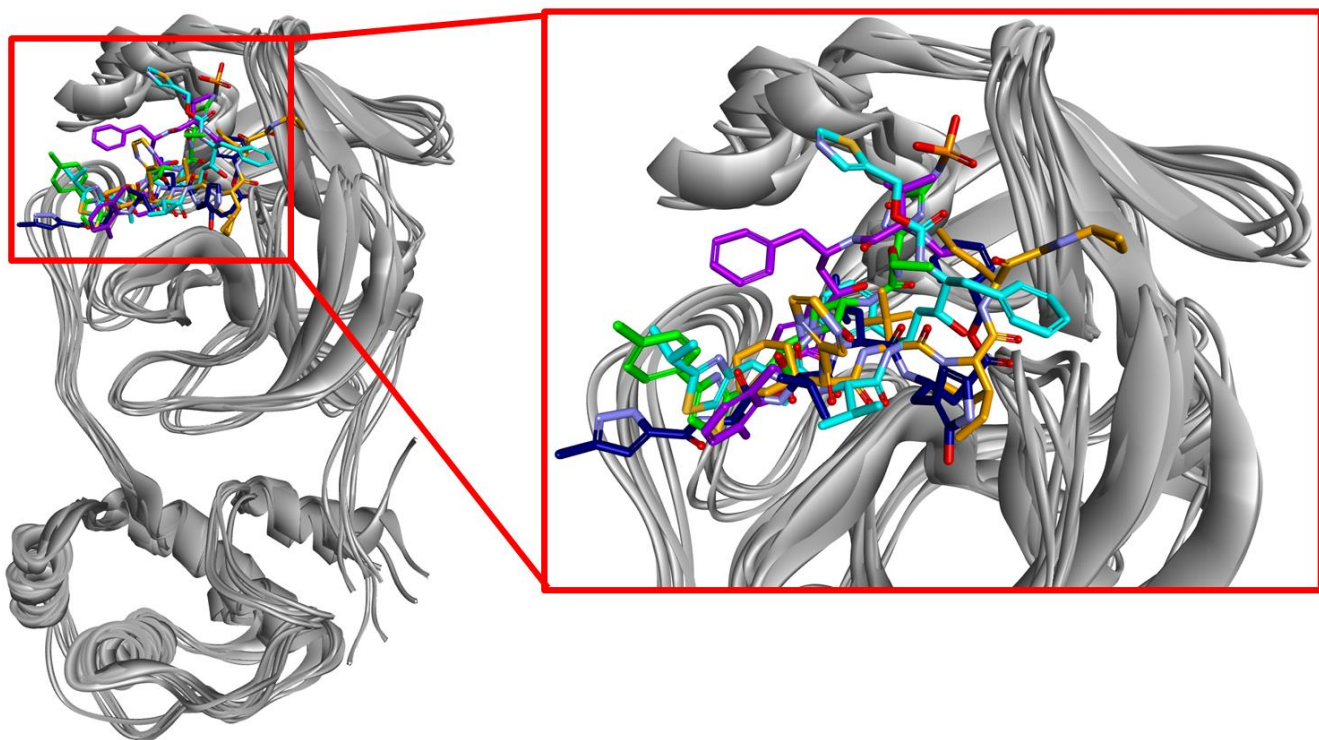

**Supplementary Figure S4.** Overlay of reference inhibitors N3, lopinavir, and ritonavir and potential drugs telaprevir and ceftaroline fosamil in the active site of SARS-CoV-2 M<sup>pro</sup>. N3 inhibitor, lopinavir, ritonavir, telaprevir, and ceftaroline fosamil are indicated in dark blue, purple, cyan, orange, and green, respectively.

**Supplementary Figure S5.** The distances between active site residues of SARS-CoV-2 M<sup>pro</sup> during 50 ns simulations with (A) Ceftaroline fosamil, and (B) Telaprevir.

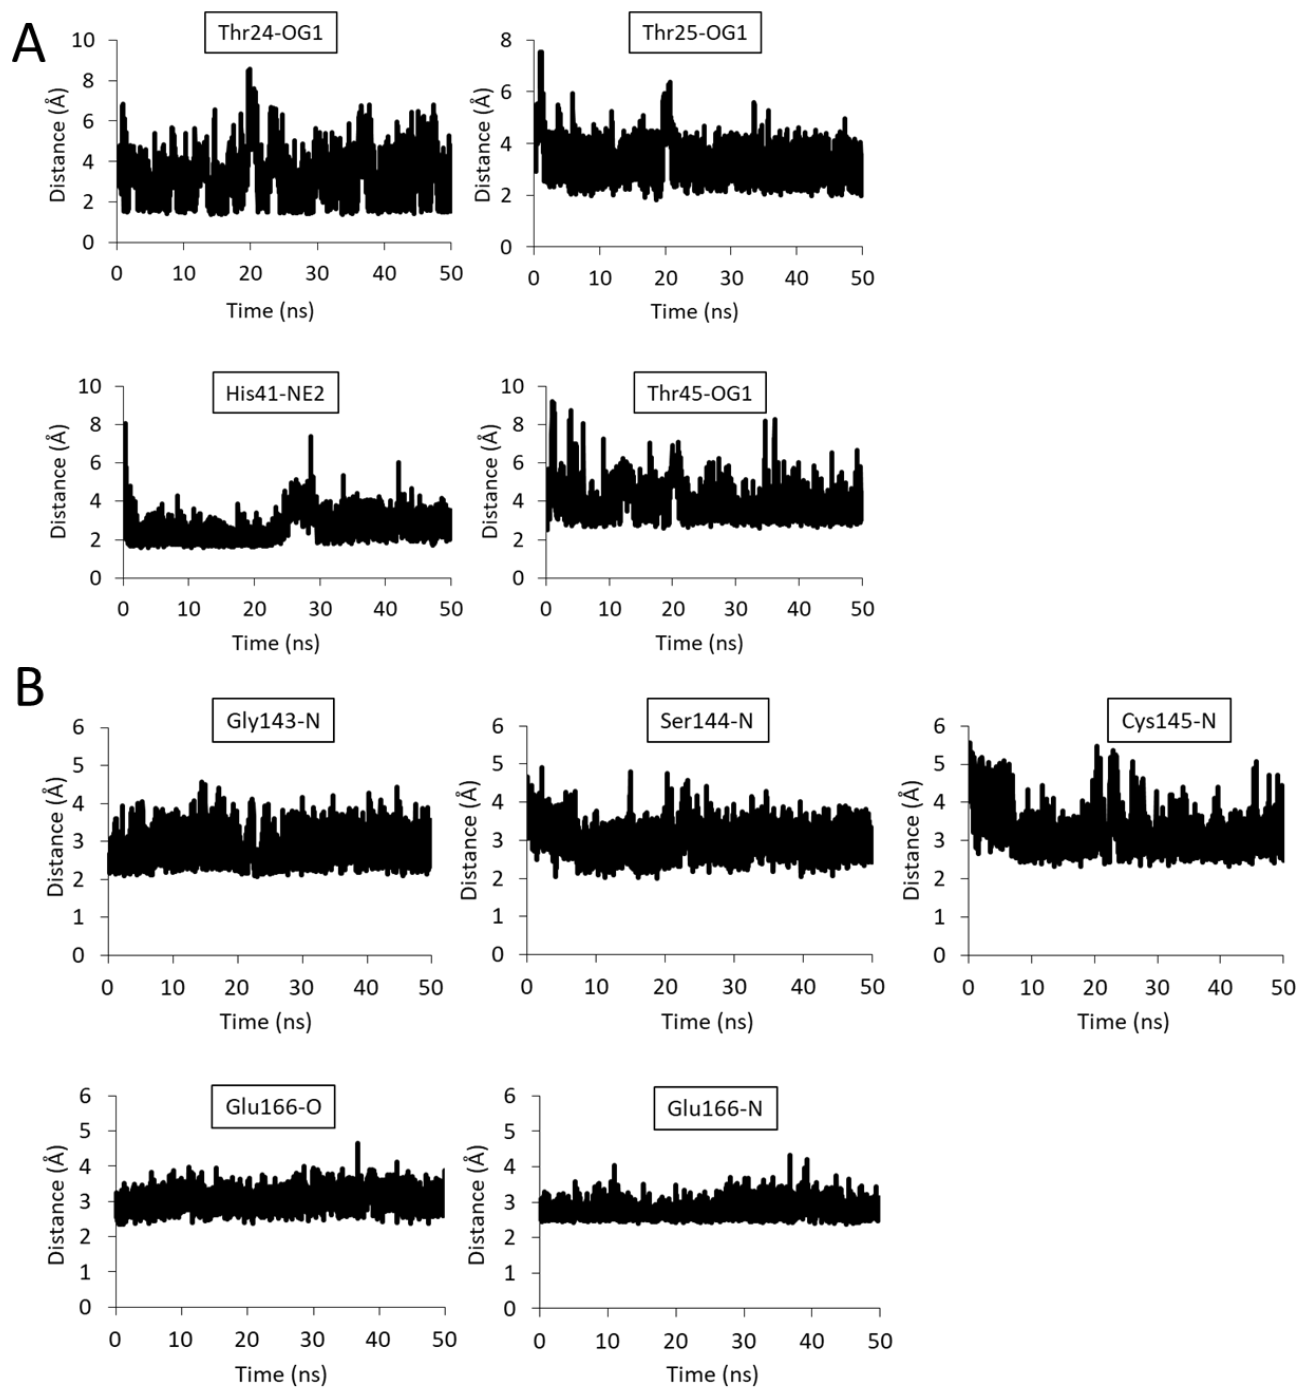

Supplement: mmc1.pdf [file mmc1.pdf]
